# Supplementary material for: A scoping review of the feasibility, usability, and efficacy of digital interventions in older adults concerning physical activity and/or exercise
Source: Front Aging. 2025 Apr 11;6:1516481. doi: 10.3389/fragi.2025.1516481 (PMC12021916; doi:10.3389/fragi.2025.1516481)
Supplement: Supplementary file 3 [file Table1.xlsx]

## Sheet: Data Table
	Characteristics of Included Studies
General Information								Intervention Characteristics
No.	Reference			Location		Study Design	Population	Aim(s) and Objective(s)	Digital Intervention	Physical Activity/Exercise Protocol	Frequency Of Reminders	Reported Outcomes (efficacy/usability/feasability)	Adherence/Compliance/Attendance	Adverse Events
1	Mair et al. (2022)			Glasgow, Scotland.		Feasibility Study	46 community dwelling healthy older adults (65.5 ± 5.4).	To describe the development of the JitaBug app and intervention, examine the feasibility of conducting a larger definitive trial on the effectiveness of the JitaBug intervention, and explore the acceptability of the intervention among older adults in a free-living setting.	6 week smartphone app study. The JitaBug app was downloaded onto participants mobile devices and paired with a FitBit. The app delivered goal-setting, planning, reminders, and JITAI messages to encourage achievement of personalized PA goal.	Physical activity protocol which consisted of aerobic forms. Participants were able to set activity goals such as activity minutes and step targets.	Participants could log activities for a specific date and time, and the app would deliver an activity reminder as a notification.	Primary Outcome Measure: Feasibility was measured via recuitment, retention, adverse events, acceptability, adherence and participant satisfaction.	87% adherence.	None attributed to the intervention.
2	Granet et al. (2022)			Montreal, Canada.		RIT	83 inactive community dwelling older adults (70 ± 5.1). Mean BMI classed them as overweight but all participants had no other counterindications to participation in exercise, were non-frail and disease free.	To confirm the feasibility and acceptability of 2 web-based PA interventions. The secondary objective was to compare the effects of two remote PA interventions on PA levels and mental health in community dwelling older adults.	12 week web-based PA intervention conducted via Zoom. Participants were randomised into live and recorded groups. There were three 55 minute sessions per week, the live group featured a certified exercise instructor whereas the recorded group were given a pre-recorded session signed off by an exercise instructor.	Exercise protocol was followed 3x per week for 1 hour per session. The exercise intervention was structured into three blocks of exercises aiming to improve muscle function, flexibility and cardiovascular capacity. On each of the three sessions one focussed on each of the aforementioned domains. Every four weeks all exercises position (sitting or standing), amplitude, number of repititions and in…	N/A	Primary Outcome Measure: Feasibility was measured using the adherence to the intervention (the proportion of sessions comleted out of the 36). Secondary Outcome Measure: Efficacy via SPPB, unipodal balance, BMI, muscular power and muscular endurance.	Criteria: >80% adherence to be considered feasible. Upon completiion there was 85% adherence.	None attributed to the intervention.
3	Bowen et al. (2017)			Alabama, USA.		RCT	30 community dwelling inactive (<150 minutes of exercise per week), overweight older black females (65 ± 3.2). At baseline, the mean waist circumference was was 42.97, body mass was 211lbs, BMI was 34.93 and HbA1c was 6.29.	To determine the feasibility and acceptability and to estimate the effect of the Texting Older Sisters to Step intervention among older inactive black women.	12 week wearable and smartphone physical activity intervention. The intervention group were given a Fitbit device and received text messages every day for the whole 12 week intervention promoting physical activity. The control group were also given a Fitbit device and recieved text messages once per week throughout the 12 week intervention promoting general health and good nutrition.	Promoting engagement in general physical activity delivered via text message including ideas for physical activity and the benefits of engaging.	Daily reminders in the intervention group and weekly reminders for the control group.	Primary Outcome Measure: Efficacy measured via Physical health measures including waist circumference, body mass and HbA1c. Secondary Outcome Measures: Feasibility and acceptability measured via a project satisfaction questionnaire.	No criteiria. 97% of the participants completed the full intervention.	None attributed to the intervention.
4	Schwartz et al. (2021)			Tel-Aviv, Israel.		Feasibility Study	31 community dwelling moderately active adults (20 women and 11 men) (72 ± 4) and BMI was 26.9 (classed as overweight), participants had no counterindication to participation in exercise and were disease free. 79% of participants came from middle-upper class backgrounds.	To design a live, online physical activity protocol and explore its feasibility over an 8 week period in a group of older adults.	8 week live and online group exercise intervention delivered via Zoom and led by 2 exercise instructors. The intervention consisted of 2 weekly live sessions lasting approximately 45 minutes.	Consisted of aerobic, resistance and mobility training. Training was completed using household items such as chairs, shopping bags, cans and bags of flour. Resistance exercises were selected to target the major muscle groups of the lower and upper body and aerobic exercises were selected to raise participants heart rate. In weeks 1-4 work to rest ratio was set at 20:30s respectively (15s each sid…	Reminders delivered via Whatsapp. Frequency not disclosed.	Feasibility measured via adverse events, adherence levels, participant satisfaction, and intentions for future participation.	Criteria: >80% adherence. 90% adherence to the intervention. 68% missed at least 1 session.	None attributed to the intervention.
5	Van Het Reve et al. (2013)			Zurich, Switzerland.		Phase II preclinical Exploratory Trial	44 community dwelling adults (75 ± 8.6). Participants were a mixture of active and inactive, they had no counterindications to exercise and were disease free.	To compare three different home-based training programmes with respect to gait quality and physical performance.	12-week tablet and brouchure intervention. The participants were randomised to three groups; social tablet guided, individual tablet guided and brochure guided. The tablet group received the intervention through the "ActiveLifestyle" app which assisted, monitored and motvated them to complete streght exercises using videos and instructions.	Consisted of both strength and balance exercises aimed at improving walking and preventing falls. The programme had two weekly resistance sessions using resistance bands and exercise balls and a warm up was coducted before each session. Flexibility exercises were conducted after each of the resistance sessions and balance exercises were completed three times, five times per week. Progression of e…	3x daily reminders via alarm clock in-built to app.	Primary Outcome Measure: Feasibility measured via programme adherence. Secondary Outcome Measures: Efficacy via physical health measures including gait analysis and physical performance.	Criteria: >75% adherence. 84% and 80% adherence in the tablet based groups.	None reported.
6	Gothe et al. (2015)			Illinois, USA.		RCT	307 community dwelling adults (71 ± 0.42). Participants were inactive.Participants were a mix of healthy adults and some had comorbidities.	To examine the efficacy of a DVD-delivered exercise programme in promoting physical activity levels in a cohort of older adults.	6-month home-based DVD-delivered exercise programme.Participants were randomised into 1 of 2 conditions [1] FlexToBa intervention group where they were encouraged to exercise with the DVD guidance every day [2] an attentional control intervention group where participants were given an already commercially available DVD. Participants in both conditions were contacted by the research staff for the …	In the FlexToBa group received exercise DVDs aimed at improving physical function. Sets of exercises were broken down into 4 week segments and each individual session contained 2 sets of 11-12 different exercises which focusses on balance, strength and flexibility. Participants were provided with a yoga mat, 2 resistance bands (light and heavy) and a handbook. Verbal instructions accompanied each…	Weekly for 8 weeks and monthly for 4 months thereafter.	Efficacy measurred via Godin Leisure Time Exercise Questionnaire (GLTEQ) and the Actigraph physical activity monitor.	No criteria. 85% participant retention.	None attributed to the intervention.
7	Taylor et al. (2019)			Sydney, Australia.		Feasibility Study	15 community dwelling adults with mild-moderate dementia (83 ± 8). Other than dementia the participants had no other comorbidities.	To determine the safety and feasibility of the standingtall programme in community dwelling older adults with dementia.	12-week tablet app intervention in which participants were provided with an Apple iPad. The app named 'StandingTall' was downloaded onto the device and aimed at training static and dynamic balance. Instructions on each exercise was provided with on screen text and through video demonstrations. Participants completed exercises with an on screen video guide.	The protocol consisted of static (tandem, semi-tandem) and dynamic (heel/toe raises, stepping, stepping on/off a box) exercises. RPE was monitored with the help of the participants caregiver after each exercise session and logged, this informed the adjustment of training to ensure exercise progressed safely. Exercise sessions were 40 minutes in weeks 1 and 2, this progressed (every 2 weeks) to 12…	Home visit in week 2 and 4. if participants had not engaged for 2 or more weeks they were contacted via telephone throughout the intervention.	Feasibility and usability measured via the system usability scale, physical activity enjoyment scale, adherence (exercise minutes) and adverse events.	No criteria. At week 12 participants were completing on average 65/120 minutes of exercise.	1 participant fell while exercising, no injury was sustained.
8	Mansson et al. (2020)			Umea, Sweden.		Qualitative Feasibility Study	67 community dwelling adults (77 ± 4), some were healthy and some were diagnosed with comorbidities, the most prevelant of which being CV and heart disease, 48 of which were female and 19 male.	To explore older adults participation in a 4-month self-managed fall prevention exercise intervention, comparing a digital exercise programme and a paper booklet programme.	4-month intervention whereby participants had a choice to choose the digital exercise group or paper booklet log exercise group. The digital exercise intervention was delivered via the 'Safe Step' app which was downloaded to participant's mobile phones or tablets and subsequently they created an account. The app based group had a range of regressions and progressions of exercises available alongs…	Both groups exercise protocol was based on the Otago exercise programme which includes a range of strength and balance exercises. Those in the app group could build their own programme on the digital interface which allowed them to set the difficulty of the training.Those in the booklet group were instructed to pick 5 exercises each from 2 sections of strength and balance exercises to make a prog…	1 telephone consultation and 3 monthly meetings.	Feasibility measured via participant survey, attrition rate and adherence to the intervention.	Criteria: Minimum 48 sessions over the 16 weeks. 75% of the digital group reported adequate exercise completion.	1 participant fell twice while exercising, no injury was sustained.
9	Silveira et al. (2013)			Trento, Italy.		Feasibility Study	11 community dwelling adults, 6 of which were female and 5 male, 7/11 of which were in good health.The mean age was 77.	To investigate the feasibility of assisting autonomous physical training of independently living elderly using a tablet-based app, the adherence to the tablet-base training programmes and the effectiveness of the system's motivation instruments.	2-week tablet-based home balance and strength intervention using the tablet app 'Active Lifestyle'. The app had a simplistic interface to promote usability along with on-screen instructions and demonstration videos. The app included in-built features such as positive reinforcement, goal setting, self monitoring and social motivation.	The 2-week intervention consisted of balance and strength exercises. The strength segment consisted of 6x warmup exercises followed by 9x strength and 3x stretching exercises. These are completed over 1-3 sets with 15-30 repitions with some requiring 2-6kg free weights. Balance exercises were completed 5x per week with 3x exercises repeated 3x with holds of up to 30s.	3x daily reminders via alarm clock in-built to app.	Feasibility measured via recruitment, attrition, adherence and a study questionnairre. Usability measured via interaction with the app.	Criteria: Minimum >50% adherence to the exercise programme as per inclusion criteria. 73% adherence across the intervention.	None reported.
10	Bieryla and Dold (2013)			Pennsylvania, USA.		Pretest-posttest control group design.	12 community dwelling older adults (82 ± 5.5 years) with no counterindication to exrcise.	To investigate the feasibility of using the Wii balance board with Wii fit to improve clinical measures of balance in older adults and retain improvements over time.	3-week Wii fit based training intervention. Participants were randomised to experimental group who attended 3x sessions per week on the Wii fit supervised by a member of the research team and a control group who only completed daily activities. Prior to the intervention numerous balance metrics were obtained from participants including Berg balance scale, Fullerton advanced balance, Functional re…	3-week programme including 3x sessions of 30 minutes.Yoga (half-moon, chair, warrior), aerobic (torso twists) and balance (soccer games, ski jump). At the end of the 3 weeks participants returned 1 week later for testing and then again 3 weeks later.	N/A	Efficacy measured via functional balance tests.	No criteira. 75% study retention.	None reported.
11	Daly et al. (2021)			Melbourne, Australia.		Pilot Study	20 community dwelling inactive but otherwise healthy olders adults (70 ± 4.2).	To evaluate feasibility, usability and enjoyment of the tablet-based 'Physitrack' app as a platform to remotely deliver and monitor a multicomponent exercise programme.	8-week multicomponent exercise intervention delivered via the tablet-based and commercially available app 'Physitrack'. This is a cloud based platform which allows health professionals to assign exercises, track progress, provide feedback and send reminders. For each exercise participants were provided a training dose (frequency, sets and repititions) by the app and asked to input RPE.	The programme included strength, weight-bearing and mobility exercises. Participants were provided 8-9x exercises for 2-3x sets for 3x 30 minites sessions per week. They were provided with a box step, dumbbells, theraband, stepping cones and balance mat.	3x home visits 1x weekly phone call for 2 weeks 1x further home visit at week 4 The app allowed participants to set up their own personal reminders	Primary Outcome Meaure: Feasibility measured via retention, enjoyment, adherence and adverse events. Secondary Outcome Measures: Efficacy via physical activity, function.	Minimum: >90% completion of the intervention and minimum >66% adherence to the programme as per inclusion criteria. 95% retention and 85% adherence.	1 participant strained their calf muscle during the exercise programme and 1 complained of knee pain (already pre-existing).
12	Liu et al. (2021)			Hong Kong, China.		Cluster RCT	40 community dwelling frail adults (76 ± 6.74).	To determine the feasibility and acceptability of a wearable activity tracker (WAT) based exercise intervention in a group of coummunity dwelling older adults and its preliminary effects.	Participants were randomised to either a 14-week WAT physical training and behaviour change based intervention or a physical training only control group. The WAT group were provided with a FitBit alongisde the mobile app for 6-months from the start of the intervention and given gudiance on how to use this to track activity.	The WAT group were given 12 weeks of balance, resistance and aerobic training at 1x 45-60 minutes session per week carried out at a centre. Participants were sent vidoes and pamphlets to use to complete these exercises at home 5x per week for 30 minutes. The control group recieved all of the above apart from the resources sent to their homes.	Hourly FitBit wearable and app reminders.	Primary Outcome Measures: Feasibility via recruitment, attrition and adherence. Acceptabiility via focus groups and interviews. Secondary Outcome Measures: Efficacy via activity levels, endurance, frailty status and self-percieved confidence.	Criteria: >70% adherence. 94.2% adherence by the WAT group.	None reported.
13	Rosenberg et al. (2010)			California, USA.		Pilot Study	19 community dwelling older adults (79 ± 8.7) with subsyndromal depression.	To assess the feasibility, acceptability and efficacy of an exergames intervention.	Participants attended their local senior community centre to participate in Wii sports based exergames. Research staff set up the euipment and and trained participants. The exergame worked via the participant moving the wireless remote device using their arm to simulate actions of the real sport.	12-week exercise protocol which included the use of the Wii sports tennis, bowling, baseball, golf and boxing games. Participants completed 3x 35 minutes sessions per week using these games and a warmup and cool down was included.	N/A	Primary Outcome Measures: Deppression and health related measures. Secondary Outcome Measure: Feasibility measured via adherence and usability measured via enjoyment measured via questionnaire.	No criteria. 84% adherence.	None reported.
14	Karssemeijer et al. (2019)			Nijmegen, Netherlands.		RCT	115 community dwelling adults (79 ± 6.9) with mild-moderate dementia.	To investigate the feasibility and efficacy of a 12-week exergame intervention compared to an equally long aerobic training and active control group.	Participants were randomised to either a 12-week exergame and aerobic training group or an active control group. The exergame group received training in a lab setting through cognitive-aerobic bicycle training using a stationary bike connected to a video screen.	The training consisted of 30-50 minutes of cycling at 65-75% heart rate reserve 3x per week while completing cognitive tasks on the screen. The controls received the same training but the bike was not connected to a video screen they also received 30 minutes of flexibility training per session.	N/A	Primary Outcome Measure: Feasibility via adherence, measures of exercise intensity and rating of exercise sessions. Secondary Outcome Measures: Efficacy via health related measures, physical functioning and physical activity.	No criteria. 87% adherence in the exergames group.	None reported.
15	Lee et al. (2022)			Seoul, South Korea.		RCT	60 community dwelling healthy adults (75 ± 4.1).	To investigate the effects of a wearable robotic hip exoskeleton (EX1) assisted exercise in various environments on physical function, muscle strength and walking efficiency in older adults.	12 week intervention delivered via the wearable hip exoskeleton worn around the wearer's waist and thighs. The deivce is designed to assist or resist hip joint flexion and extension promoting muscular development or facilitating movement.	Participants were randomised to 4 groups (walking with no EX1, walking with EX1 resistance mode, stair walking with EX1 assitance mode, incline treadmill walk with EX1 assistance mode). Group 1 completed a 300m walk at a comfortable pace, group 2 performed the same, group 3 completed a stair climb with with assitance torque at 8.2 Nm and group 4 completed a 16% incline treadmill walk with assitan…	N/A	Efficacy measured via pre and post testing of physcial function, cardiopulmonary metabolic efficiency and muscle strength.	Not reported.	None reported.
16	Katrancha et al. (2015)			Pennsylvania, USA.		Pretest-posttest 1-arm design	32 community dwelling healthy adults (73 ± 8.6).	To evaluate the effects of a 12-week video guided Tai Chi exercise programme on centre of balance and falls efficacy in healthy community dwelling older adults.	12-week intervention delivered via DVD format within senior community centre. Participants were also allowed a copy of the video for home use.	3x 45 minute Tai Chi sessions 3x per week (36 total sessions). Weeks 1-2 covered learning Tai Chi form. Weeks 3-12 included 20 minutes warmup followed by Yang Style 5-form Tai Chi repeated 7 times (21 minutes), concluded by a 4 minute cool down.	Phone call reminders if participants missed 1 or more sessions.	Efficacy measured via pre and post testing of centre of balance and falls efficacy.	No criteria. <25% completed the intervention.	None reported.
17	Szturm et al. (2011)			Manitoba, Canada.		RCT	30 community dwelling frail but otherwise healthy adults (81 ± 6.5).	To examine the feasibility and benefits of physical therapy delivered via a video game platform.	8-week exergame intervention. The video game utilised a pressure mat and screen where participants stood in front of during the session. 3 games were played which involved shifting body weight while maintaining balance.	16 sessions scheduled 2x per week at 45 minutes per session. The control group received typical strength and balance exercise whereas the exergame group received dynamic balance training built into the exergame.	N/A	Efficacy measured via Berg balance scale, TUG, spatial-temporal gait parameters, activities specific balance confidence scale, clinical test of sensory interaction and balance.	No criteria. 90% of sample completed the intervention.	None reported.
18	Yang et al. (2020)			Tainan, Taiwan.		RCT	20 community dwelling adults (68) with no counterindications to exercise.	To examine the effects of Kinect exercise on balance training in comparison to conventional exercise in community dwelling older adults.	5-week balance training intervention delivered via Microsoft Kinect for Xbox 360 which was connected to a projector in a community activity centre. Games suitbale for training older adults static and dynamic balance were selected and completed as a group. Games including Zen energy, Yoga, destination bollywood, cardio boxing, humana vatality and cardio were selected.	2x 45 minutes sessions per week for 5 weeks. The Kinect group completed games in a group following along with a nominated participant as the 'leader' each game targeted aerobic fitness, balance and strength. The conventional exercise group received a 2 stage exercise regimen. Stage 1 consisted of a 5 minute warm up followed by a 15 minute training period, 3 minute break and 5 minute cool down. Ex…	Participants reminded each other when group exercise sessions were running.	Primary Outcome Measure: Efficacy measured via pre and post intervention assessment of balance. Secondary Outcome Measure: Feasibility measured via the attendance rate.	No criteria. 96% attendance in the control group. 100% attendance in the intervention group.	None reported.
19	Shake et al. (2018)			Kentucky, USA.		RIT	105 sedentary but otherwise healthy community dwelling older adults (73 ± 7.8).	To assess whether a game-centred tablet app that combines bingo with exercise and other health activities can engender high rates of adherence among older adults and improve physical and cognitive performance.	Participants were randomised to either a bingo + health education + exercise group or a bingo + health education group. Both groups recieved a 10-week intervention delivered via a tablet app named 'Bingocize'. Participants sat at a large table with the app loaded on a tablet, a coach supervised each session and the bingo game was used to asscoiate numbers with either an exercise (intervention gro…	Exercise protocol was designed using the ACSM guidelines for exercise for older adults. 12 exercies were completed, equally divided into cardiovascular/balance, strength and flexibility. Resistance exercise was progresssed from 8 repititions per exercise to 15 by the end of the intervention. RPE was used to monitor intensity and participants were encouraged to maintain moderate effort.	N/A	Efficacy measured via physical and congnitive performance measures.	No criteria. 94% attendance in the intervention group and 93% attendance in the control group.	None attributed to the intervention.
20	Yamada et al. (2011)			Kyoto, Japan.		RCT	84 community dwelling adults (83 ± 6.1).	To investigate the feasibility and effectiveness of a DVD-based seated dual task stepping exercise for improvement of dual task walking in community dwelling older adults.	Participants were randomised into a DVD exercise group or a non-exercise control group. 24 week group training intervention at a senior centre led by an exercise DVD.	The DVD group completed 20 minute training sessions 2x per week. The training included stretching, strength and agility work while seated, this was then progressed to dual task training which involved stepping up and down on a box as fast as possible while performing a verbal fluency task.	N/A	Efficacy measured via pre and post intervention functional walking tests.	No criteria. 87.5% adherence in DVD group.	None reported.
21	Montero-Alia et al. (2019)			Mataro, Spain		RCT	977 community dwelling ambulatory adults (75) who were attending community primary care centres.	To determine whether balance training delivered via the WiiFit improved balance in older adults in older adults.	12-week intervention. Participants were randomised to either a WiiFit balance training group or control group who received normal care. The intervention group received training through the WiiFit console in their primary care centre. Participants completed sessions in groups of 4 and stood on the WiiFit board and carried out the on screen balance games.	Balance training protocol delivered 2x per week for 30 minutes, inlcuding games like balance bubble, soccer heading, ski jump, and tightrope walk. Instructors were present to monitor the sessions and ensure safety. Repititons vaired depending on participants agility levels but the time dedicated to each exercise was the same for each participant.	N/A	Efficacy measured via change in Tinetti balance test score.	Criteria: Participants must have attended >80% of the sessions. 64% completed the trial.	None reported.
22	Roopchand-Martin et al. (2015)			Kingston, Jamaica		Single group pretest/posttest design.	33 community dwelling adults (70 ± 6.7).	To examine the effects of 6 weeks of balance training using the 'WiiFit plus' on balance in community dwelling older adults.	6-week balance exercise intervention delivered via the 'WiiFit plus'. The games were operated using a balance board and screen for participant to follow along. Sessions took place at the university campus.	WiiFit exercise protocol was delivered 2x per week for 30 minutes, allowing one rest day between activity. As the weeks progressed more challenging balance games were added. Participants were monitored throughout the intervention.	N/A	Efficacy measured via change in BBS balance test score.	No criteria. 85% of participants attended all sessions.	None reported.
23	Li et al. (2022)			Oregon, USA.		Feasibility Study	69 community dwelling adults (75) with cognitive impariment.	To examine feasibility, acceptability and safety of cognitive-enhanced Tai Ji Quan (TJQ) training delivered via remote video-conferencing for older adults with mild cognitive impairment.	16-week home-based intervention where particpants were randomised to either a cognitively enhanced Tai Ji Quan, standard Tai Ji Quan or stretching group. All 3 intervention arms were delivered remotely via Zoom and exercise instructors trained for the study led the sessions. Participants were sent secure Zoom links for the sessions via email.	Exercise protocols were delivered 2x per week for 60 minutes. Tai Ji Quan included 5-15 minutes warm up, 45-55 minutes of training and 1-2 minutes cool down. The first group added cognitive tasks in from week 10 onwards. The stretching group followed various stretching exercises done either seated or standing.	Email reminders sent prior to each session.	Feasibility measured via fidelity, attrition, retention, acceptability and adverse events.	Criteria: >75% attendance rate. 76.5% attendance in intervention group, 75.5% and 75.3% in the remaining grouos respectively.	None attributed to the intervention.
24	Wong et al. (2005)			Hong Kong, China.		Feasibility Study	20 community dwelling adults (75 ± 7) with knee pain for an average of 4 years.	To explore the feasibility and efficacy of a community-based exercise programme for elderly patients with knee pain conducted via videoconferencing.	12-week intervention delivered via videoconferencing carried out at 2 community centres with a physiotherapist based at a local hospital on the call.	Videoconferencing sessions were conducted 1x per week to reinforce the home exercise plan. Participants were given a home-based exercise programme to complete delivered via a booklet with drawings and instructions. The programme included stretching, strengthening and functional exercise. Exercise was completed 3x per week for 2 sets of 10-15 repititions per exercise and recorded in the booklet.	N/A	Primary Outcome Measure: Efficacy measured via SF-36. Secondary Outcome Measure: Efficacy and feasibility measured via knee ROM, quadricep strength, functional capacity, balance, QOL, knowledge test, adherence and acceptance.	No criteria. 76% adherence to programme.	None reported.
25	Geraedts et al. (2017)			Gronigen, The Netherlands.		Prospective Cohort Study	40 community dwelling adults (81 ± 4.6) with frailty.	To assess the feasibility and user opinion on independent use of remote novel technology in a home-based exercise programme for older adults.	6-month intervention delivered using a necklace worn activity sensor and a Dell tablet for exercise instruction. The exercise programme was in-built to a web application downloaded onto the tablet. Each exercise prescribed had a dedicated video and once complete a motivational message displayed on screen.	The exercise protocol consisted of strength and balance exercise divided into 18 levels, starting with 10 minutes and increasing to 45 minutes. Participants were asked to complete training 5x per week for 45 minutes. The first 3 months were supervised via remote coaching weekly telephone calls, the remaining 3 months were unsupervised with no calls.	Weekly telephone reminders for the first 3 months.	Feasibility and usability measured via adherence, technical and operational feasibility, determinants of participation, user evaluation.	Criteria: >70% adherence. 60.9% adherence.	None reported.
26	Franco et al. (2012)			Massachusetts, USA.		RIT	32 community dwelling relatively healthy adults (78 ± 6)	To determine whether balance 1) improves after 3 week period training with the WiiFit 2) balance improves more using WiiFit as compared to MOB exercises 3) WiiFit activities are enjoyable.	3-week intervention where participants were randomly divided into a WiiFit group who completed balance and home exercise, matter of balance group who cpmpleted exercise in their programme administered by an exercise physiologist and a control group who recieved no intervention. The WiiFit group recieved individual training carried out at a senior centre, participnts were given options for what ga…	The WiiFit group trained multiple balance games 2x per week for 10-15 minutes and had supllementary home exercises to complete. The MOB group trained their programme 2x per week for 30-45 minutes per session.	N/A	Primary Outcome Measure: Efficacy measured via pre/post balance testing, SF-36 and enjoyment.	No criteria. 100% attendance in all groups.	None reported.
27	Granet et al. (2023)			Montreal, Canada.		Feasibility Study	46 community dwelling adults (>60).	To investigate the feasibility and acceptability of two web-based exercise interventions combining live and pre-recorded online sessions and their efficacy on health parameters in inactive but non-frail community dwelling older adults.	12 week web-based PA intervention conducted via Zoom. Participants were randomised into a live-recorded-live or recorded-live-recorded group. Group 1 had live sessions on Mondays and Fridays with recorded sessions on Wednesdays. Group 2 had recorded sessions on Mondays and Fridays and a live session on a Wednesday. Live sessions were led by a kinesiologist on the Zoom platform and recorded sessio…	Exercise protocol was followed 3x per week for 1 hour per session. The exercise intervention was structured into three blocks of exercises aiming to improve muscle function, flexibility abd cardiovascular capacity. On each of the three sessions one focussed on each of the aforementioned domains. Every four weeks all exercises position (sitting or standing), amplitude, number of repititions and in…	N/A	Primary Outcome Measure: Feasibility measured via adherence and acceptability measured via a survey. Secondary Outcome Measure: Efficacy measured via functional capacity, physical performance and physical health measures.	Criteria: >80% adherence to programme. 92% and 85% adherence in both groups respectively.	None attributed to the intervention.
28	Gschwind et al. (2015)			New South Wales, Australia.		RCT	153 community dwelling adults (75 ± 6.5).	To investigate the feasibility and effectiveness of the indivdually tailored ICT-based system iStopFalls exergame programme delivered through the home television on fall risk factors.	4-month intervention delivered via the iStopFalls system, this was set up in participants homes. This was set up using a computer, Microsoft Kinect, Google TV set top box, senior mobility monitor and a Nexus 7 tablet. Exergames were available on the system throuhg controlling an on-screen avatar. Participants were randomised to the exergames group to recive training or a control group, both of wh…	3x balance sessions per week at 40 minutes per session. 3x muscle strengthening sessions per week at 15-20 minutes per session. Balance exercises consisted of shifting, bending or stepping and cognitive tasks were added in when exergames levels were increased week on week. Muscle strengthening focused on lower extremities including knee extension, knee flexion, hip abduction, calf raises and toe …	Home visit in week 2 of the intervention. Electronic reminders if required.	Primary Outcome Measure: Efficacy measured via fall risk measured via physiological profile assessment. Secondary Outcome Measure: Physical, health, cognitive, usability and feasibility measures.	Criteria: 48hrs (3hrs) per week. Intervention group only managed 11hrs of use.	None reported.
29	Padala et al. (2017)			Arkansas, USA.		RCT	30 community dwelling adults (68 ± 6.7) with balance problems.	To test the efficacy of an 8-week WiiFit program for improving balance in older veterans with balance problems and to explore the effects of the exergames on on fear of falling, exercise enjoyment and quality of life.	8-week intervention in which participants were randomised to either an exergames or control group. The exergame intervention was delivered using the WiiFit at an outpatient medical centre. Balance training based games were conducted on the WiiFit balance board.	Exergame exercise protocol was followed 3x per week at 45 minutes per session. They conducted exercise games targetting yoga, strength training, aerobics and balance. Each session was supervised by a research assistant and had a warmup and cooldown built in. The control group completed cognitive exercises.	N/A	Primary Outcome Measure: Efficacy measured via the BBS. Secondary Outcome Measures: fear of falling and feasibility via enjoyment and QOL measured via questionnaires.	No criteria. 100% adherence.	None reported.
30	Jansons et al. (2022)			Geelong, Australia.		Feasibility Study	15 community dwelling adults (70 ± 4).	To assess the feasibility of the study process and provide estimates on variability of key outcomes related to physical function and health related QOL for a home-based exercise programme delivered via an Amazon Alexa.	12-week intervention delivered via an Amazon Alexa tablet. These devices were sent to participants with set up guidance and instructions for use. The application 'Teletrainer' was downloaded onto devices which allowed participants to set reminders, watch videos, and search for information.	Exercise snacking' individualised programme was devised by an exercise physiologist on the study. Participants completed 2x 10 minute exercise snacks per day for the first 4 weeks, 3x sessions for the second 4 weeks and 4x sessions for the last 4 weeks. Each exercise snack involved body weight only exercises for the upper and lower body, exercise difficulty was progressed by increasing range and …	2x daily reminders via Amazon Alexa device.	Primary Outcome Measure: Feasibility measured via adherence, retention and adverse events. Secondary Outcome Measures: Usability measured via the SUS, efficacy measured via physical functioning and health related QOL.	Criteria: >66% adherence to programme. 115% mean adherence to the exercise programme.	None reported.
31	Delbaere et al. (2021)			Sydney, Australia.		RCT	503 community dwelling adults (77 ± 5.5).	To determine the effect of 'StandingTall' on the recommended set of core outcomes for fall prevention trials in older people.	2-year intervetion where participants were randomised to a 'StandingTall' intervention or health education control group. Both were completed on a tablet computer. In the 'StandingTall' intervention, participants recieved exercise equipment sent to their homes. The programme allowed for goal setting and exercise progression.	2 hours per week minumum exercise completion. This started at 40/min per week and increased fortnightly until participants reached the goal of 2 hours. Exercises were focussed on individually tailored balance exercises.	Participants set their own reminders through the tablet device via the in-built calendar. Phone call reminders if participants did not use the app for 100/min per week. 1 home vist in week 2-3 and a second in week 4.	Primary Outcome Measure: Efficacy measured via rate of falls. Secondary outcome measures: Efficacy measured via balance and neuropsychological testing.	No criteria. 82% completed the intervention.	None reported.
32	Li et al. (2020)			Pennsylvania, USA.		Feasibility Study	8 community dwelling adults (74 ± 5.4).	To evaluate a personalised behavioural intervention for older adults on its feasibility and efficacy for outcomes including physical activity and sleep.	6-week physical activity intervention delivered via a tablet app and wearble device. The apps motobody and Google calendar were paired with the wearble for daily step goals and reminders. The research team developed a further app 'Elderfit' which sent sedentary reminder to participants.	Physical activity was prescribed fro the Go4Life programme and consisted of steps, strength, flexibiliy and balance activities. Initial step goals were set based on initial activity levels, if the goal was met the next week it would increase by 500 steps and if not met this would remain the same. Participants self-monitored their physical activity and recorded this each night, participants who me…	The app developed alognside the wearable sent sedentary reminders if participants had >90 minutes of inactivity. The Google calendar app was utilised to ensure participants were sent reminders and motivational messages to meet physical activity goals.	Efficacy measured via physical acitivity levels measured via the ActiWatch 2.	Participants asked to wear the Actiwatch 2 for 7 consecutive days. 89% adherence.	None reported.
33	Alley et al. (2023)			Queensland and South Australia, Australia.		RCT	124 community dwelling adults (70 ± 4.5).	To examine the engagement, acceptability, usability and satifaction of 'Active for Life', a web-based computer-tailored physical activity intervention for older adults with and without FitBit integration.	12-week intervenion where participants were randomised to a tailored advice and FitBit group, tailored advice only group or wait list control group. All participants except for the control group were given access to the 'Active for Life' web-based tablet computer programme. This programme gave tailored physical activity guidance which included 6 modules of advice released fortnightly throughout t…	5x sessions of moderate activity per week at 30 minutes per session and 2x strength and flexibility sessions per week. Participants were prescribed activity throught the web-based programme and at the end of module 2 and 4 were given a 4-week strength programme prescribed by a physiotherapist, this was to help them meet the 2x sessions of stregth exercise per week.	3x reminder emails to complete new sessions.	Usability and acceptability measured via 4 online surveys.	Participants asked to wear the accelerometer for 7 consecutive days on week 1 and week 12. 72% and 66% adherence in the FitBit + tailoring group and the tailoring group only respectively.	None reported.
34	Ozaki et al. (2017)			Obu, Japan.		Crossover Trial	27 community dwelling adults (73 ± 6) with frailty or pre-frailty.	To examine the effect of training using the balance exercise assist robot (BEAR) system on postural strategy, muscle strength and enjoyment amaong frail older adults in comparuson with conventional physical training.	12-week intervention where participants were randomised to either a robotic exercise group or conventional exercise group. After 6 weeks the groups swapped over. Robotic exercise was delivered via the BEAR system. Participants attended the lab where they played a tennis game, the system had 2 footpads on which participants could stand and shift their centre of gravity.	Exercise was carried out 2x per week for 6 weeks and included a warm up and cool down. The BEAR group completed swaying and rotation movements while playing the game and the conventional group completed one to one muscle strengthening and balance training with a physiotherapist.	N/A	Primary outcome measure: Efficacy measured via functional capacity and muscle strength. Secondary Outcome Measure: Usability measured via enjoyment measured via questionnaire.	No criteria. 93% completed the study.	None reported.
